# Supplementary material for: Comparative Genomics Reveals Chd1 as a Determinant of Nucleosome Spacing in Vivo
Source: PubMed Central journal article supplement (PMC4555225; doi:10.1534/g3.115.020271), 2015-07-14
Supplement: supp_g3.115.020271_020271SI.pdf [file supp_g3.115.020271_020271SI.pdf]

**Comparative genomics reveals Chd1 as a determinant of nucleosome spacing in vivo**

Amanda L. Hughes<sup>1</sup> and Oliver J. Rando<sup>1†</sup>

*<sup>1</sup>Department of Biochemistry and Molecular Pharmacology, University of Massachusetts Medical School, Worcester, MA 01605, USA*

† To whom correspondence should be addressed. Email: [Oliver.Rando@umassmed.edu](mailto:Oliver.Rando@umassmed.edu)

DOI: [10.1534/g3.115.020271](https://doi.org/10.1534/g3.115.020271)

Figure S1

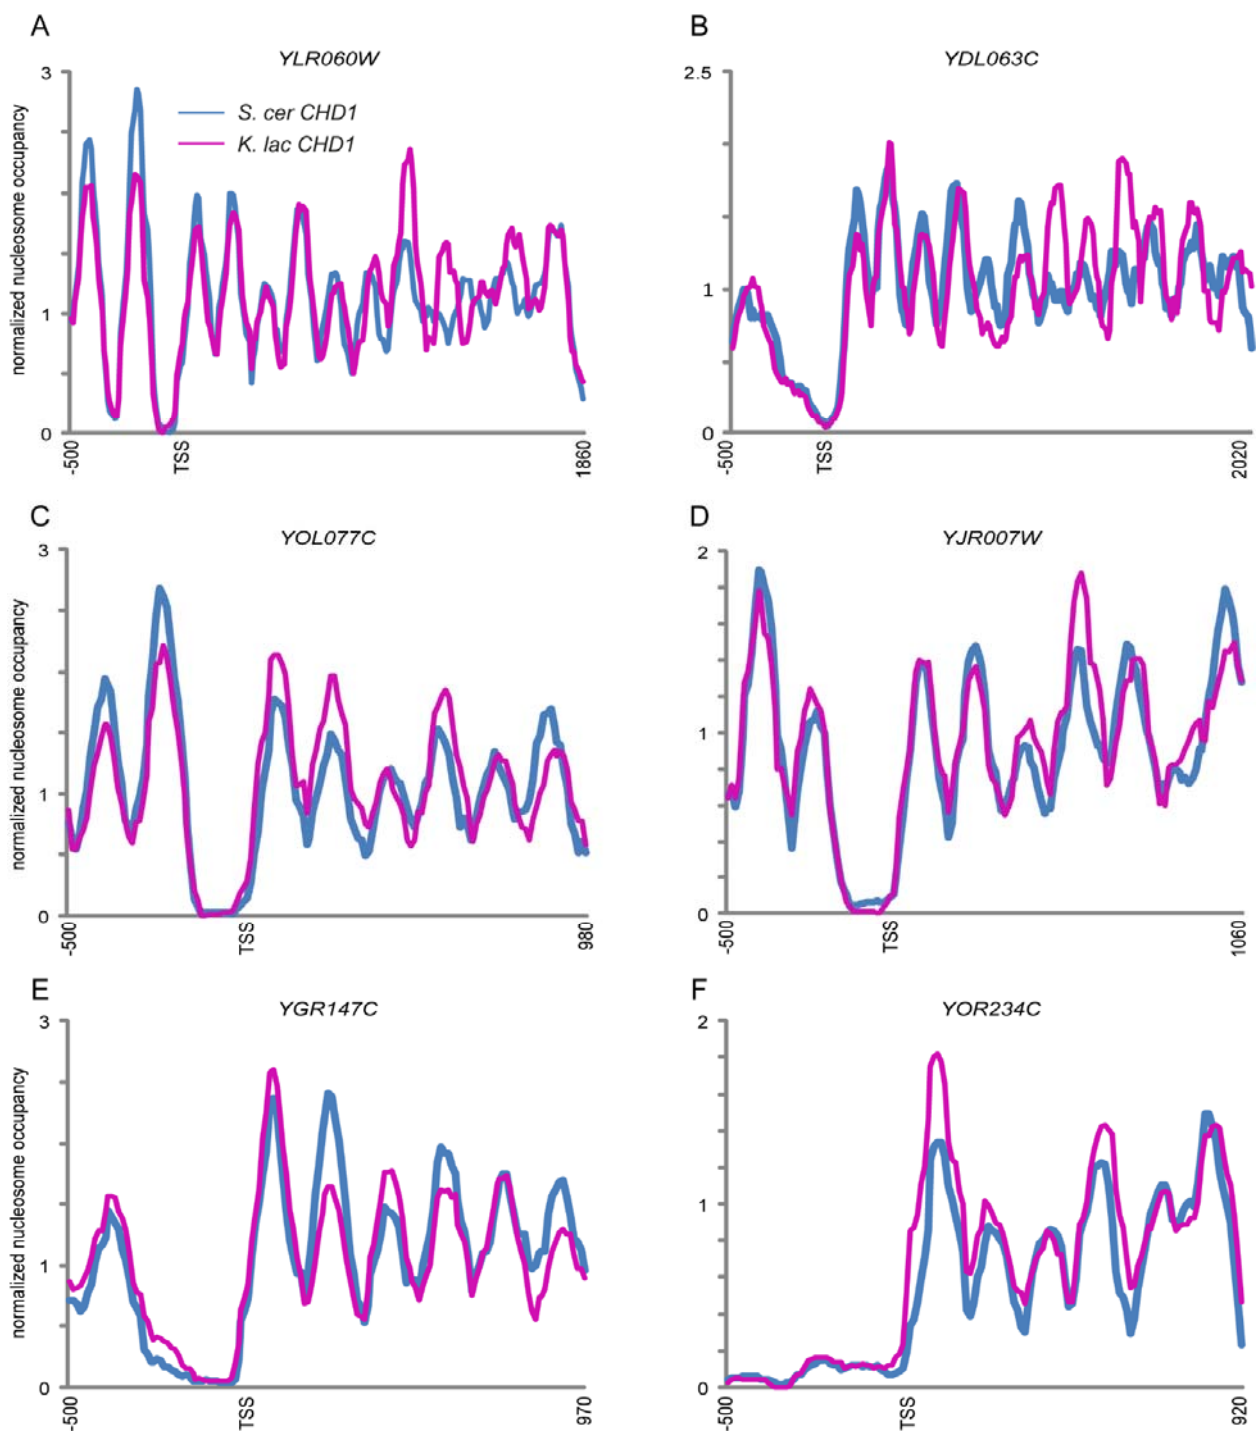

**Figure S1 Individual gene examples showing effects of *K. lactis* CHD1 orthologue on nucleosome positioning.** Six individual genes from the dataset shown in **Figure 2**, including examples with evident nucleosome shifts as well as genes with no discernable effects of the CHD1 swap.

Figure S2

A

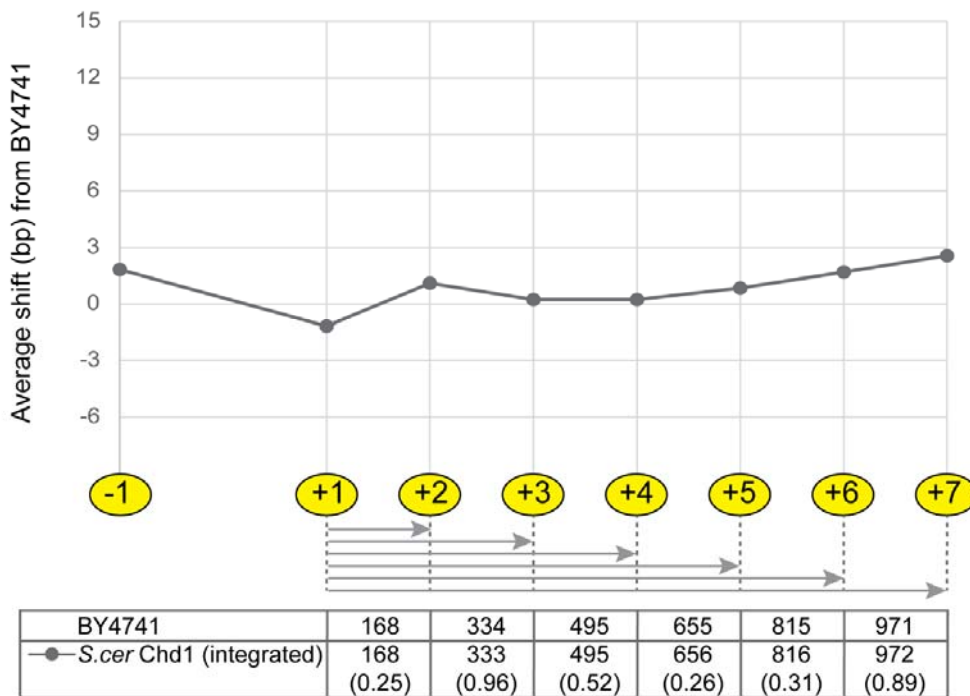

B

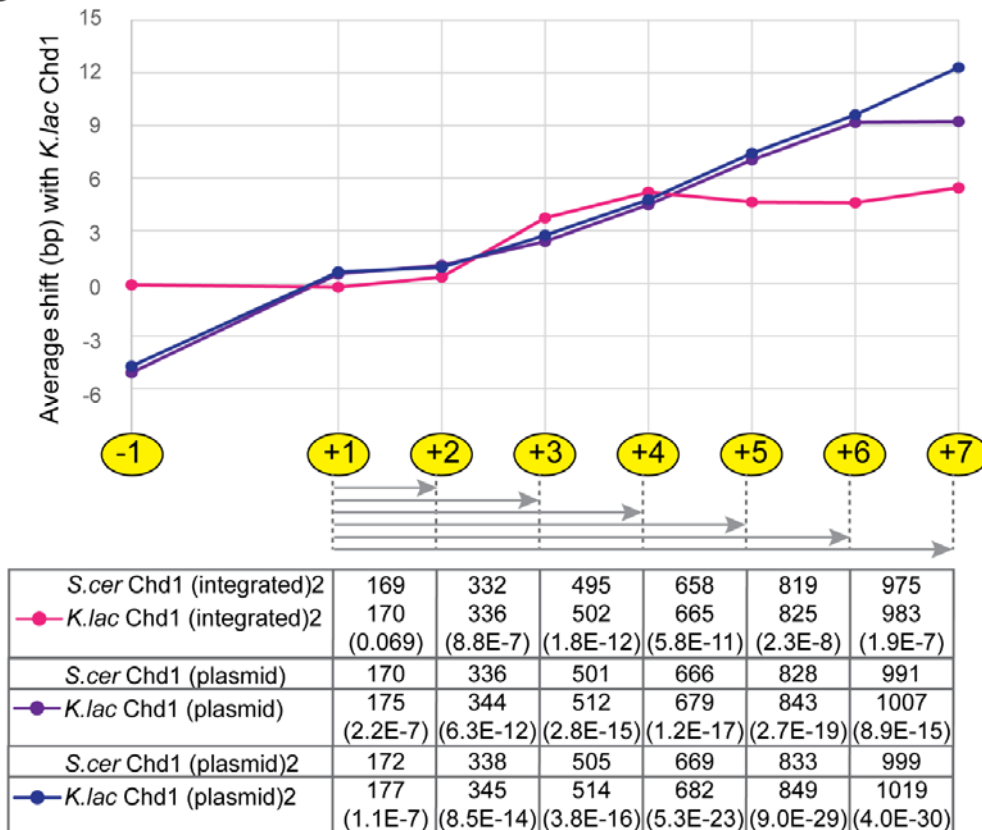

**Figure S2 The *K. lactis* CHD1 orthologue can direct wider spacing of *S. cerevisiae* nucleosomes from both plasmid and endogenous expression.** Plot of shifts in -1 to +7 nucleosome positions between *S. cerevisiae* and *K. lactis* CHD1 swap strains, as in **Figure 2B-C**. In each case, top panel shows distances between equivalent nucleosomes for the pair of strains indicated, while bottom panel shows the average distance of genic nucleosomes from the +1 nucleosome, along with corresponding p-values for the swap strains. **(A)** shows that this metric is specific, as no significant changes are found between wild-type yeast and a “pseudo wild-type” with a genomic *chd1Δ* deletion covered by a plasmid-borne CHD1 gene. **(B)** shows that effects of *K. lactis* CHD1 on nucleosome spacing are reproducible both for genomically-integrated swap strains as well as plasmid-borne CHD1 swaps.

Figure S3

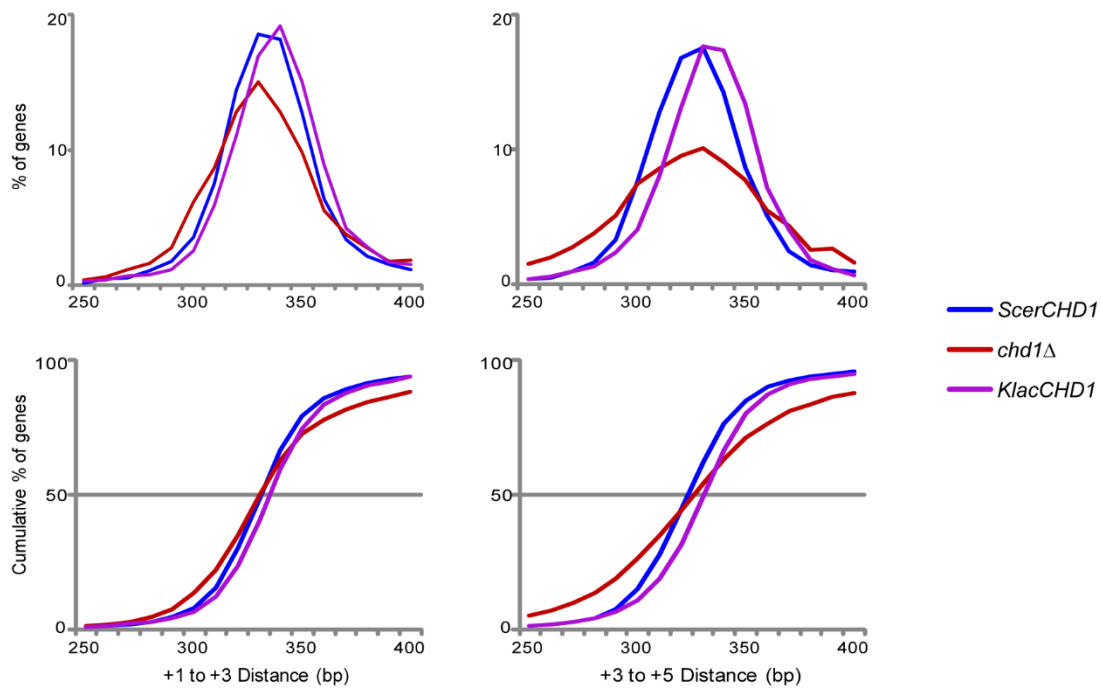

**Figure S3 Distribution of nucleosome spacing changes in *CHD1* swap strains.** Quantitation of internucleosome distances in the three strains detailed in **Figure 2A**. For each nucleosome mapping dataset, nucleosome positions were called as in (WEINER *et al.* 2010). Left panels show distances from all ORF +1 nucleosomes to the corresponding +3 nucleosome, while right panels show +3 to +5 nucleosome distances. Top panels show the histogram of all such distances for the three strains, color-coded as in (A), while bottom panels show the same data as cumulative distribution plots. A replicate for these integrated strains as well as 2 replicates for plasmid-borne *CHD1* strains are shown in **Supplemental Figure S2**.

Figure S4

A

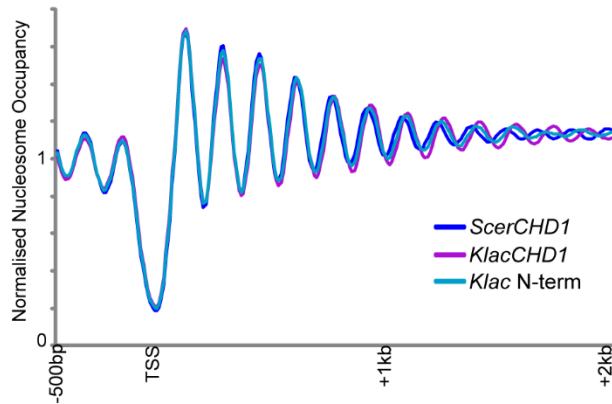

B

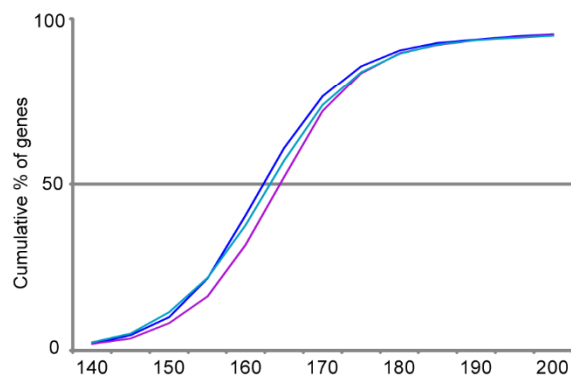

C

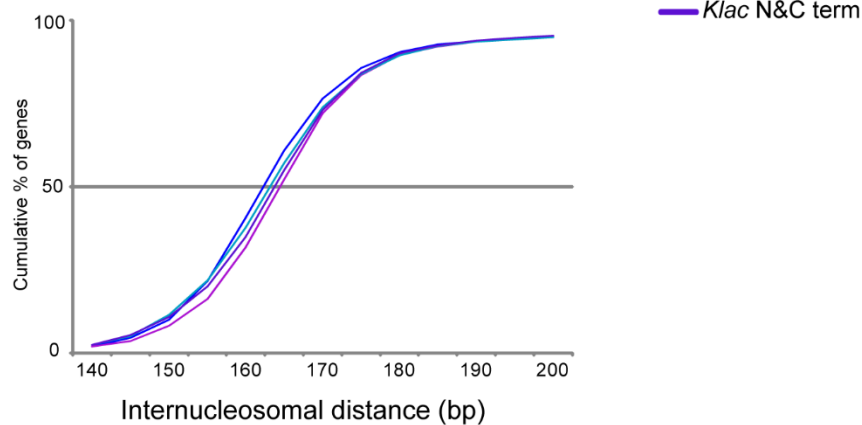

**Figure S4 Differences between *S. cerevisiae* and *K. lactis* Chd1 that affect nucleosome spacing are distributed throughout the protein. (A)** Genome-wide nucleosome mapping data are shown for strains carrying both species' *CHD1* orthologs, and for a strain carrying a chimaeric *CHD1* with only the N-terminal portion of the *K. lactis* ortholog. **(B-C)** Cumulative distribution plots of internucleosome distances for the indicated chimaeric *CHD1* strains.

Figure S5

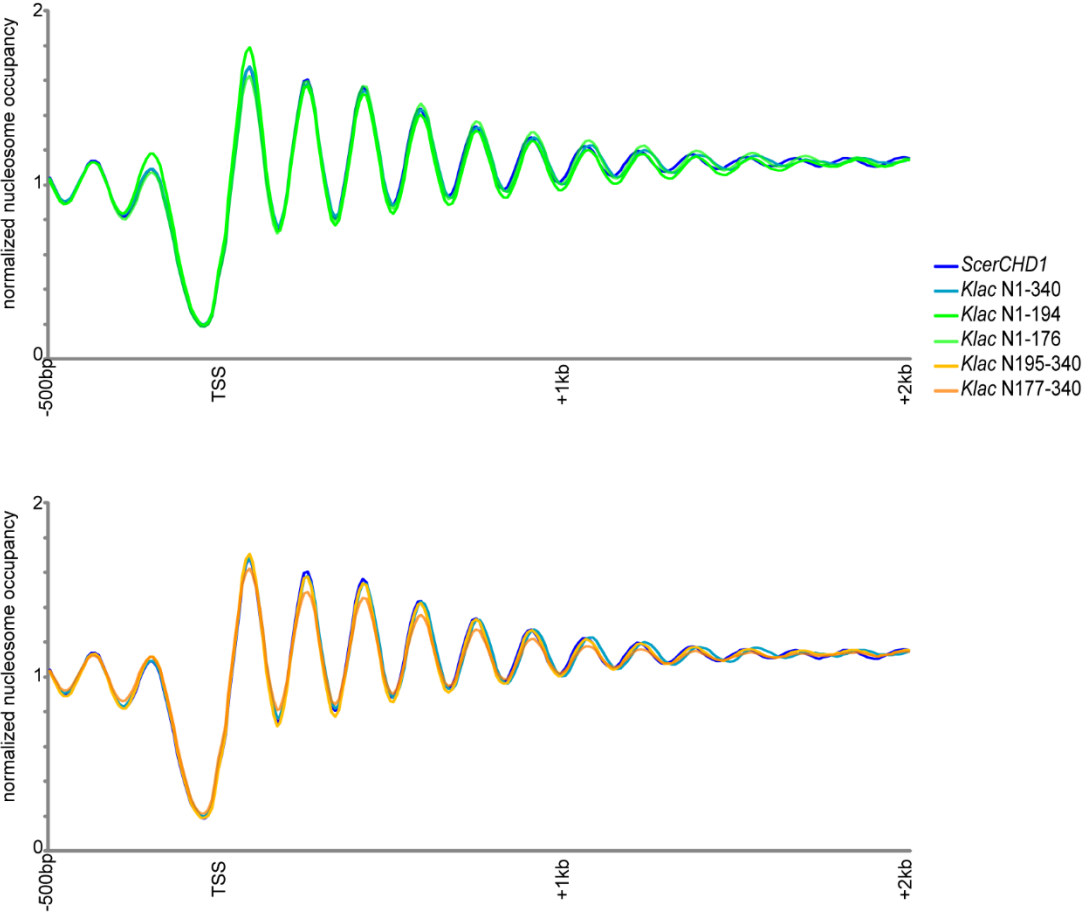

**Figure S5 Genome-wide data for N-terminal swaps.** Averaged TSS-aligned genome-wide nucleosome mapping data for the strains shown in **Figure 5**.

Figure S6

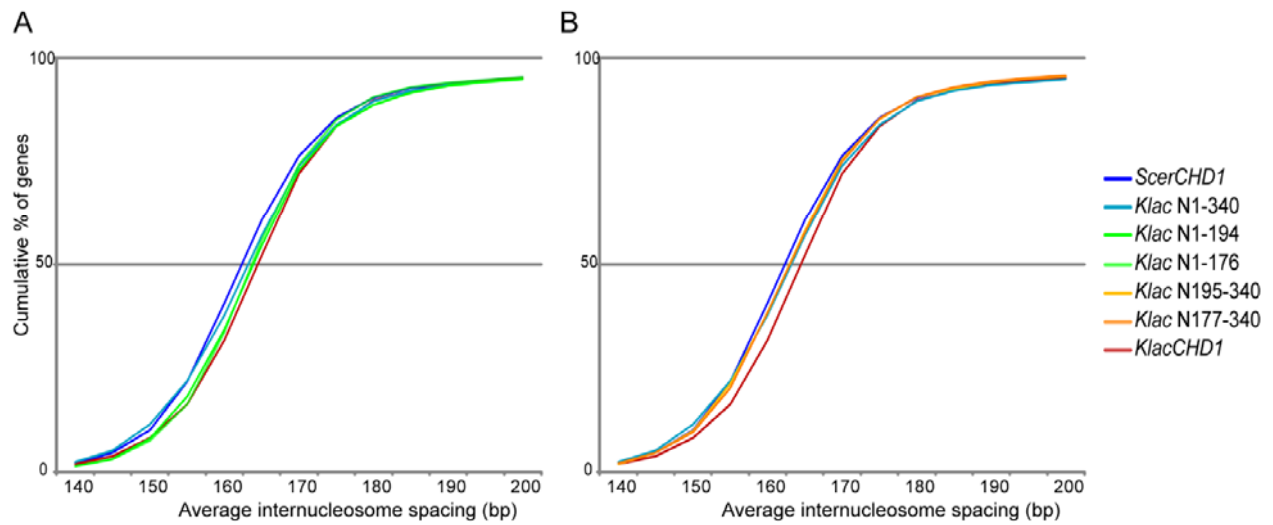

**Figure S6 Distribution of nucleosome position changes in N-terminal swaps.** Cumulative distribution data for internucleosome distances for Chd1 swaps affecting the indicated domains. Note the significant effect of swaps affecting the unstructured N-terminal 180 amino acids (A), and the lack of effect of swaps altering the chromodomains (B).



Figure S7

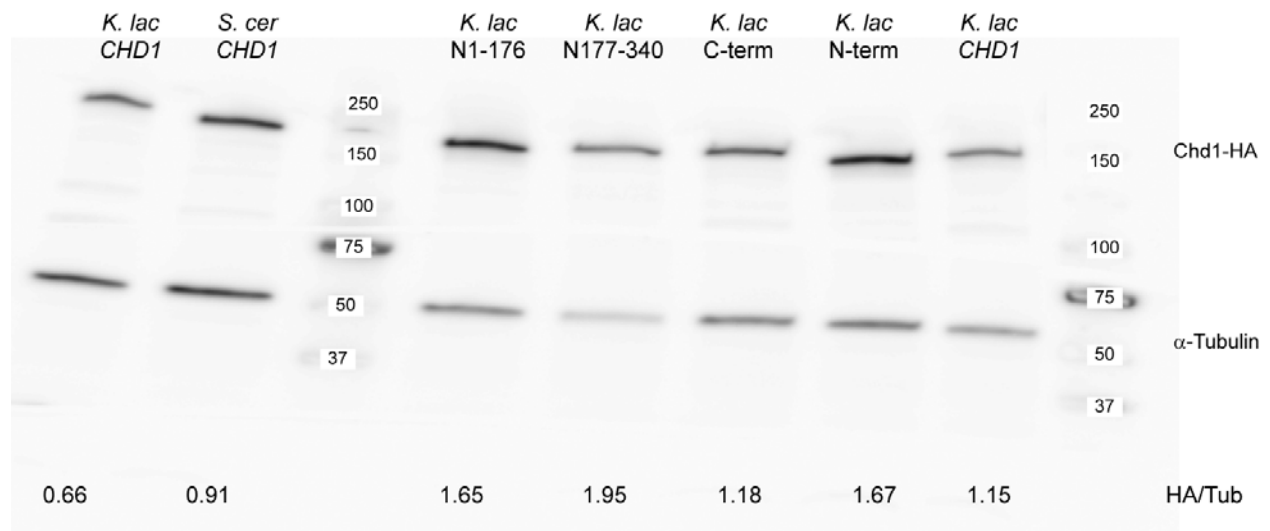

**Figure S7 Chd1 abundance is unaffected by *K. lactis* sequence.** Lysates of HA-tagged Chd1 strains were blotted for HA and  $\alpha$ -tubulin (control), showing no correlation between Chd1 protein abundance and in vivo nucleosome spacing activity.

Figure S8

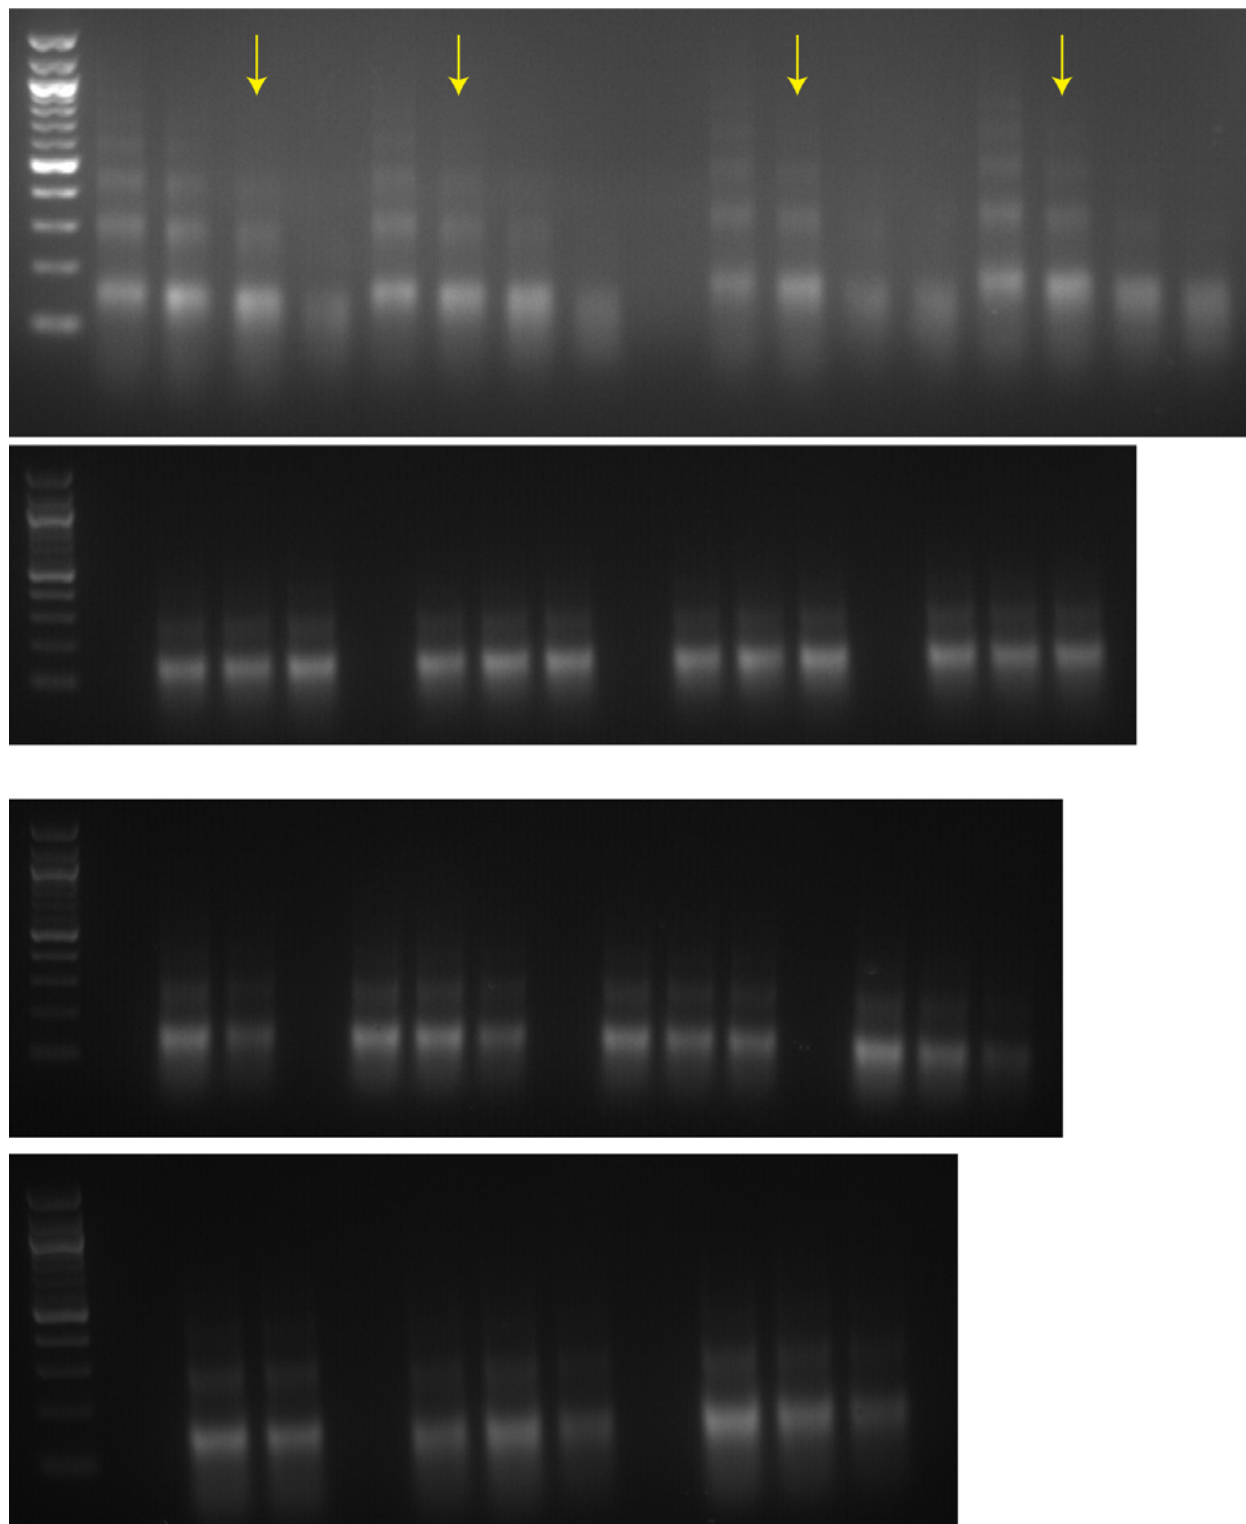

**Figure S8 Example MNase digestions.** Four representative experiments, with top panel showing a wide MNase titration for four strains – yellow arrows indicate the MNase level chosen for purification of mononucleosomal DNA. For the remaining three panels, MNase level was titrated more closely around a target concentration, resulting in more similar laddering for each titration step.
