# Supplementary material for: Comparative Genomics Reveals Chd1 as a Determinant of Nucleosome Spacing in Vivo
Source: PubMed Central journal article supplement (PMC4555225; doi:10.1534/g3.115.020271), 2015-07-14
Supplement: supp_g3.115.020271_FigureS1.pdf [file supp_g3.115.020271_FigureS1.pdf]

Figure S1

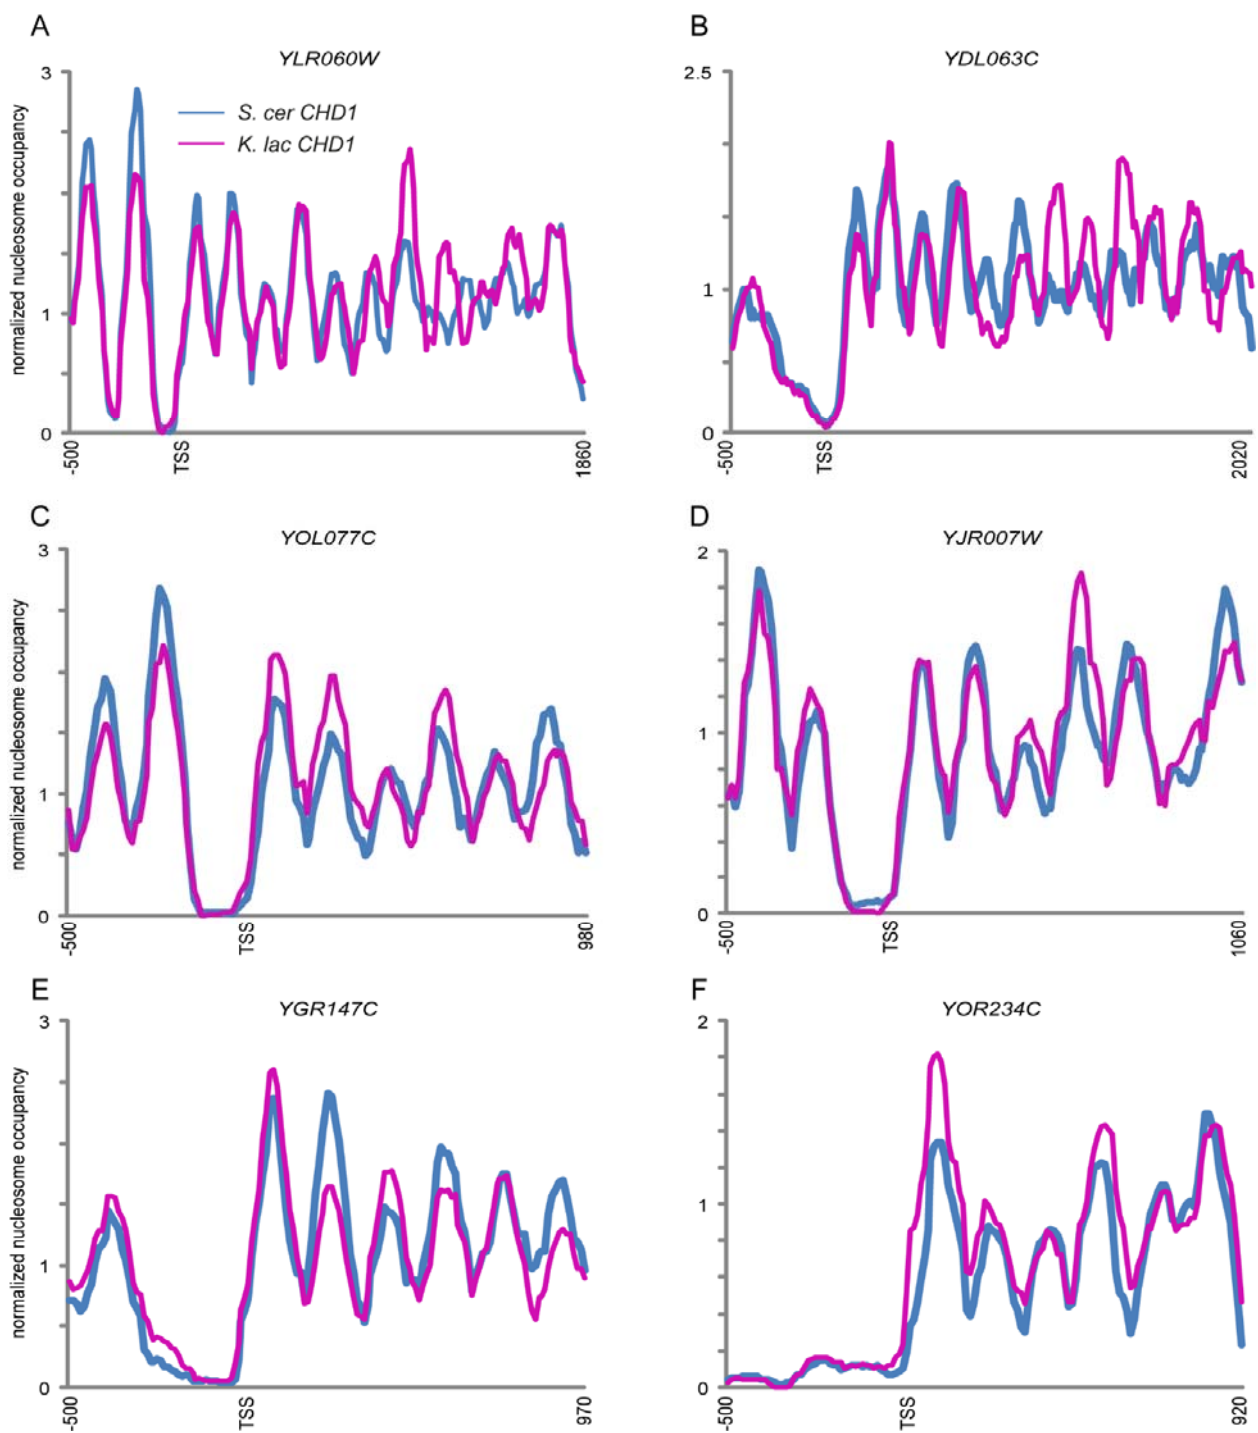

**Figure S1 Individual gene examples showing effects of *K. lactis* CHD1 orthologue on nucleosome positioning.** Six individual genes from the dataset shown in **Figure 2**, including examples with evident nucleosome shifts as well as genes with no discernable effects of the CHD1 swap.
