# Supplementary material for: Comparative Genomics Reveals Chd1 as a Determinant of Nucleosome Spacing in Vivo
Source: PubMed Central journal article supplement (PMC4555225; doi:10.1534/g3.115.020271), 2015-07-14
Supplement: supp_g3.115.020271_FigureS2.pdf [file supp_g3.115.020271_FigureS2.pdf]

Figure S2

A

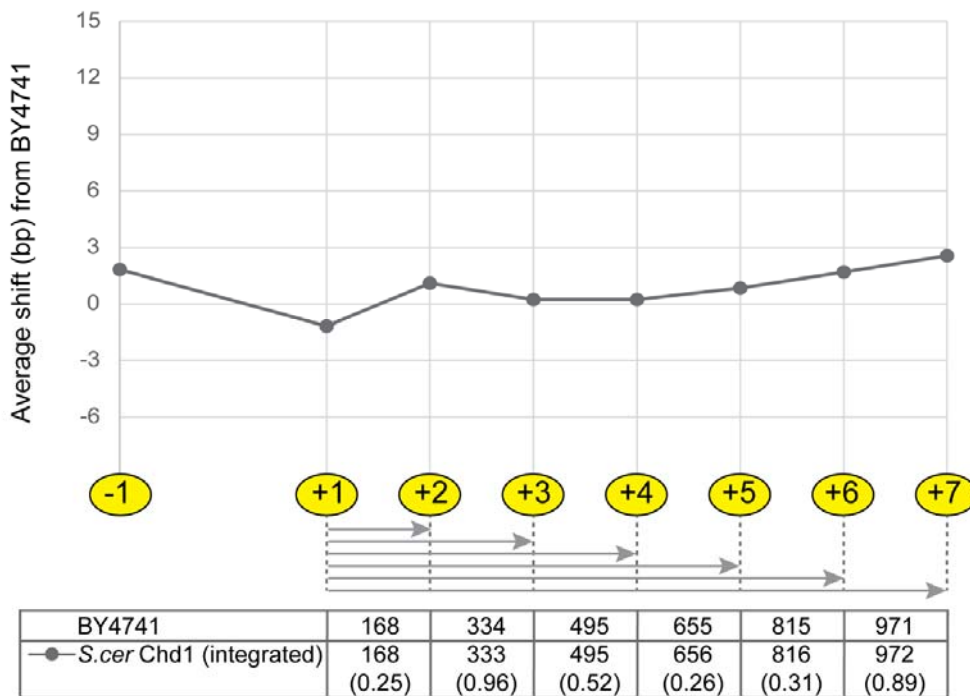

B

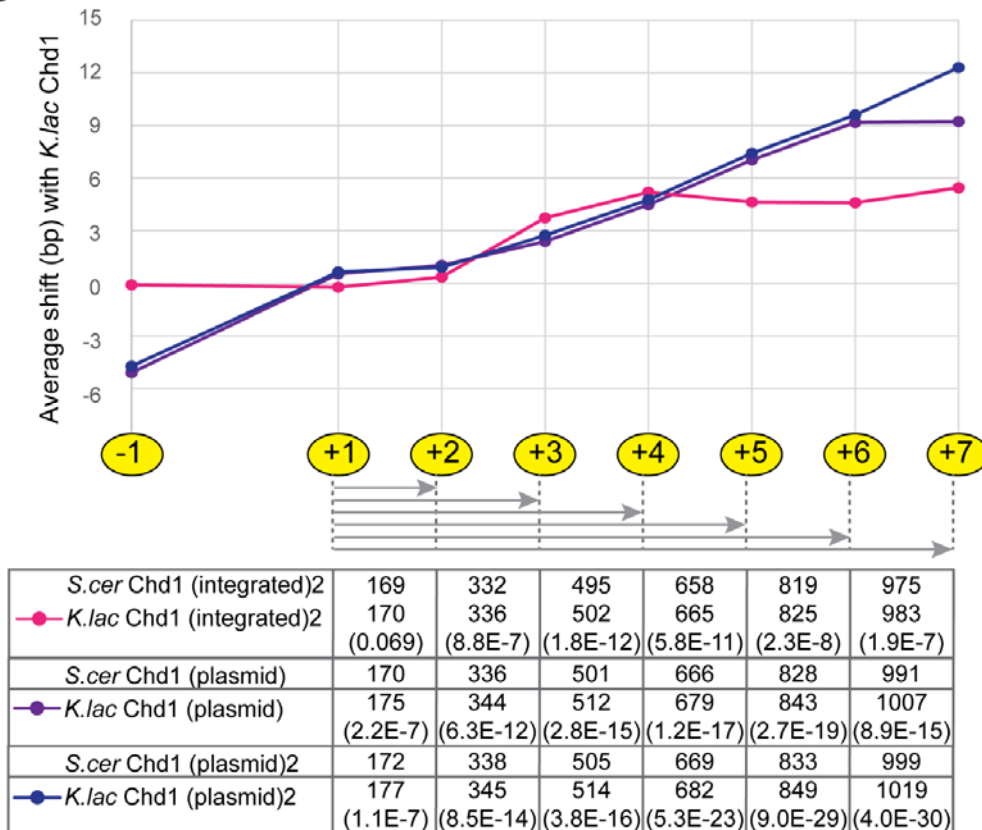

**Figure S2 The *K. lactis* CHD1 orthologue can direct wider spacing of *S. cerevisiae* nucleosomes from both plasmid and endogenous expression.** Plot of shifts in -1 to +7 nucleosome positions between *S. cerevisiae* and *K. lactis* CHD1 swap strains, as in **Figure 2B-C**. In each case, top panel shows distances between equivalent nucleosomes for the pair of strains indicated, while bottom panel shows the average distance of genic nucleosomes from the +1 nucleosome, along with corresponding p-values for the swap strains. **(A)** shows that this metric is specific, as no significant changes are found between wild-type yeast and a “pseudo wild-type” with a genomic *chd1Δ* deletion covered by a plasmid-borne CHD1 gene. **(B)** shows that effects of *K. lactis* CHD1 on nucleosome spacing are reproducible both for genomically-integrated swap strains as well as plasmid-borne CHD1 swaps.
