# Supplementary material for: Comparative Genomics Reveals Chd1 as a Determinant of Nucleosome Spacing in Vivo
Source: PubMed Central journal article supplement (PMC4555225; doi:10.1534/g3.115.020271), 2015-07-14
Supplement: supp_g3.115.020271_FigureS5.pdf [file supp_g3.115.020271_FigureS5.pdf]

Figure S5

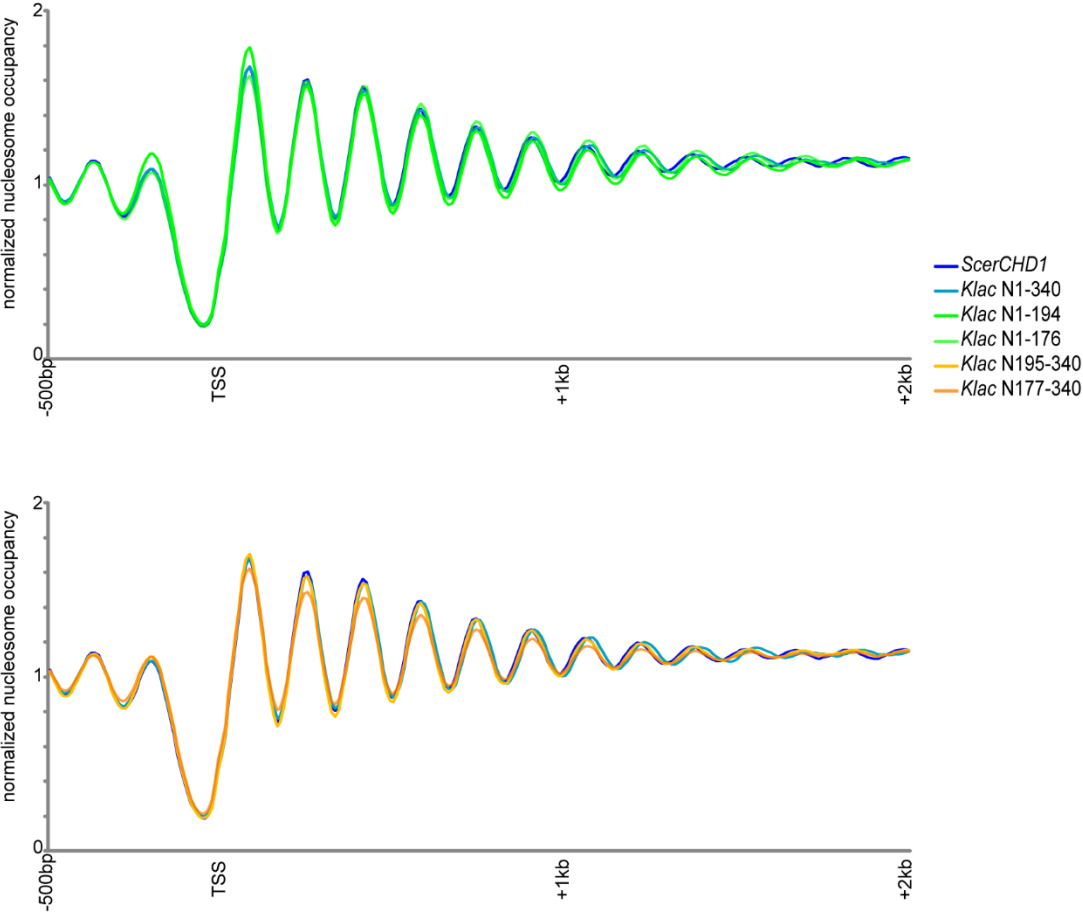

**Figure S5 Genome-wide data for N-terminal swaps.** Averaged TSS-aligned genome-wide nucleosome mapping data for the strains shown in **Figure 5**.
