# Supplementary material for: Comparative Genomics Reveals Chd1 as a Determinant of Nucleosome Spacing in Vivo
Source: PubMed Central journal article supplement (PMC4555225; doi:10.1534/g3.115.020271), 2015-07-14
Supplement: supp_g3.115.020271_FigureS6.pdf [file supp_g3.115.020271_FigureS6.pdf]

Figure S6

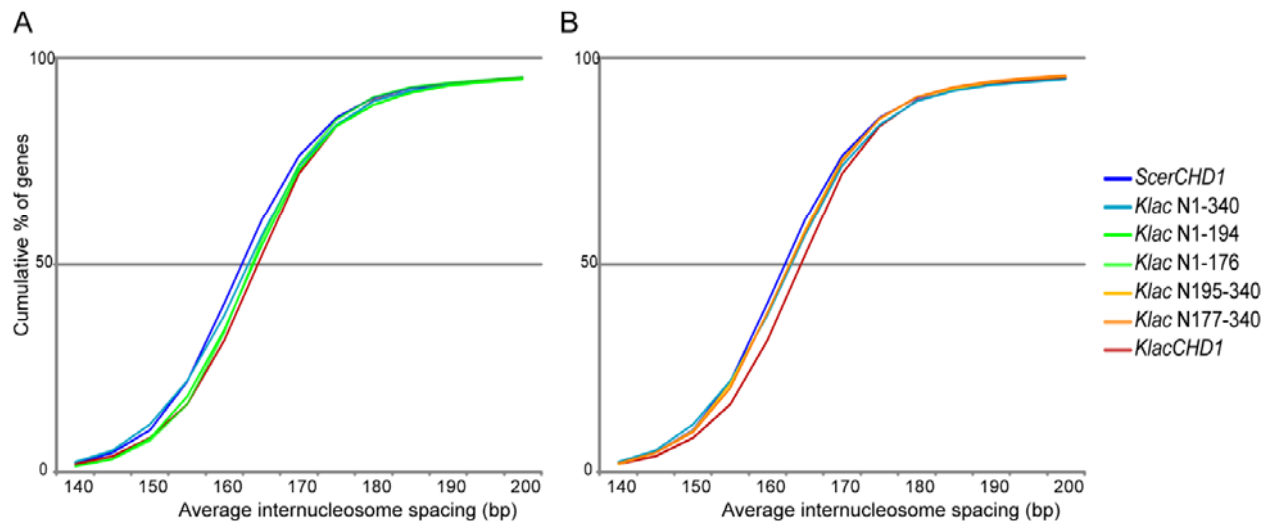

**Figure S6 Distribution of nucleosome position changes in N-terminal swaps.** Cumulative distribution data for internucleosome distances for Chd1 swaps affecting the indicated domains. Note the significant effect of swaps affecting the unstructured N-terminal 180 amino acids (A), and the lack of effect of swaps altering the chromodomains (B).
