# Supplementary material for: Comparative Genomics Reveals Chd1 as a Determinant of Nucleosome Spacing in Vivo
Source: PubMed Central journal article supplement (PMC4555225; doi:10.1534/g3.115.020271), 2015-07-14
Supplement: supp_g3.115.020271_FigureS7.pdf [file supp_g3.115.020271_FigureS7.pdf]

Figure S7

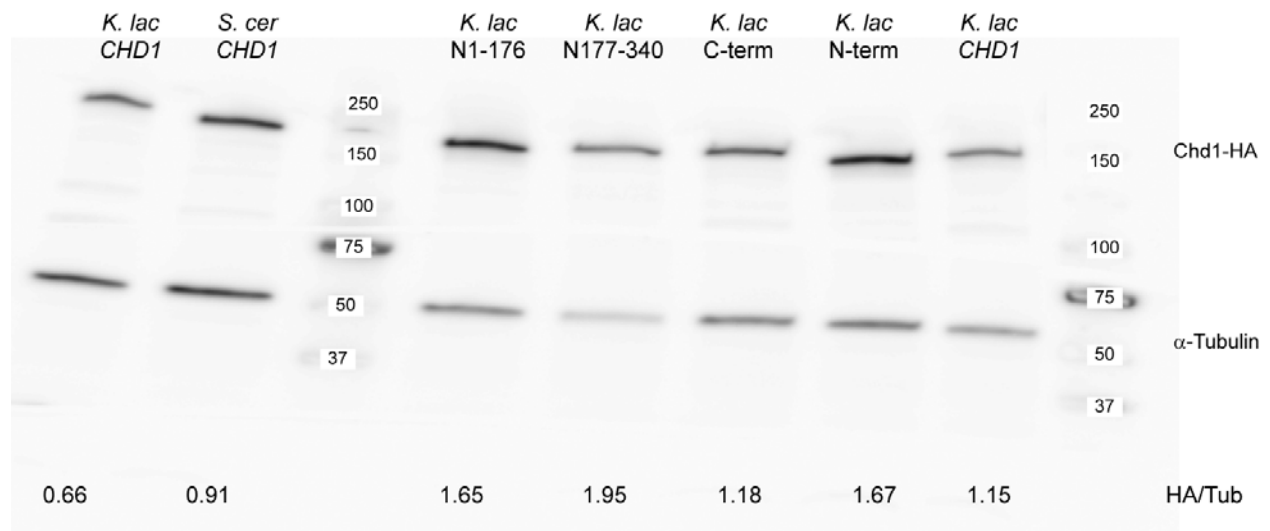

**Figure S7 Chd1 abundance is unaffected by *K. lactis* sequence.** Lysates of HA-tagged Chd1 strains were blotted for HA and  $\alpha$ -tubulin (control), showing no correlation between Chd1 protein abundance and in vivo nucleosome spacing activity.
